# Supplementary material for: Prevalence of Depression among Healthcare Workers during the COVID-19 Outbreak: A Systematic Review and Meta-Analysis
Source: MDPI journal article supplement (doi:10.3390/jcm10153406), 2021-07-30
Supplement: s1 [file s1]

**Table S1.** PRISMA Checklist.

| Section/topic              | #  | Checklist item                                                                                                                                                                                                                                                                                              | Reported on page # |
|----------------------------|----|-------------------------------------------------------------------------------------------------------------------------------------------------------------------------------------------------------------------------------------------------------------------------------------------------------------|--------------------|
| TITLE                      |    |                                                                                                                                                                                                                                                                                                             |                    |
| Title                      | 1  | Identify the report as a systematic review, meta-analysis, or both.                                                                                                                                                                                                                                         | 1                  |
| ABSTRACT                   |    |                                                                                                                                                                                                                                                                                                             |                    |
| Structured summary         | 2  | Provide a structured summary including, as applicable: background; objectives; data sources; study eligibility criteria, participants, and interventions; study appraisal and synthesis methods; results; limitations; conclusions and implications of key findings; systematic review registration number. | 2                  |
| INTRODUCTION               |    |                                                                                                                                                                                                                                                                                                             |                    |
| Rationale                  | 3  | Describe the rationale for the review in the context of what is already known.                                                                                                                                                                                                                              | 3                  |
| Objectives                 | 4  | Provide an explicit statement of questions being addressed with reference to participants, interventions, comparisons, outcomes, and study design (PICOS).                                                                                                                                                  | 3                  |
| METHODS                    |    |                                                                                                                                                                                                                                                                                                             |                    |
| Protocol and registration  | 5  | Indicate if a review protocol exists, if and where it can be accessed (e.g., Web address), and, if available, provide registration information including registration number.                                                                                                                               | N/A                |
| Eligibility criteria       | 6  | Specify study characteristics (e.g., PICOS, length of follow-up) and report characteristics (e.g., years considered, language, publication status) used as criteria for eligibility, giving rationale.                                                                                                      | 3                  |
| Information sources        | 7  | Describe all information sources (e.g., databases with dates of coverage, contact with study authors to identify additional studies) in the search and date last searched.                                                                                                                                  | 3                  |
| Search                     | 8  | Present full electronic search strategy for at least one database, including any limits used, such that it could be repeated.                                                                                                                                                                               | 3                  |
| Study selection            | 9  | State the process for selecting studies (i.e., screening, eligibility, included in systematic review, and, if applicable, included in the meta-analysis).                                                                                                                                                   | 3                  |
| Data collection process    | 10 | Describe method of data extraction from reports (e.g., piloted forms, independently, in duplicate) and any processes for obtaining and confirming data from investigators.                                                                                                                                  | 3                  |
| Data items                 | 11 | List and define all variables for which data were sought (e.g., PICOS, funding sources) and any assumptions and simplifications made.                                                                                                                                                                       | 3                  |
| Risk of bias in individual | 12 | Describe methods used for assessing risk of bias of individual studies (including specification of whether this was                                                                                                                                                                                         | 4                  |

|                               |                                                                                                                                                                                                             |   |
|-------------------------------|-------------------------------------------------------------------------------------------------------------------------------------------------------------------------------------------------------------|---|
| studies                       | done at the study or outcome level), and how this information is to be used in any data synthesis.                                                                                                          |   |
| Summary measures              | 13 State the principal summary measures (e.g., risk ratio, difference in means).                                                                                                                            | 4 |
| Synthesis of results          | 14 Describe the methods of handling data and combining results of studies, if done, including measures of consistency (e.g., I <sup>2</sup> ) for each meta-analysis.                                       | 4 |
| Risk of bias across studies   | 15 Specify any assessment of risk of bias that may affect the cumulative evidence (e.g., publication bias, selective reporting within studies).                                                             | 4 |
| Additional analyses           | 16 Describe methods of additional analyses (e.g., sensitivity or subgroup analyses, meta-regression), if done, indicating which were pre-specified.                                                         | 4 |
| RESULTS                       |                                                                                                                                                                                                             |   |
| Study selection               | 17 Give numbers of studies screened, assessed for eligibility, and included in the review, with reasons for exclusions at each stage, ideally with a flow diagram.                                          | 4 |
| Study characteristics         | 18 For each study, present characteristics for which data were extracted (e.g., study size, PICOS, follow-up period) and provide the citations.                                                             | 4 |
| Risk of bias within studies   | 19 Present data on risk of bias of each study and, if available, any outcome level assessment (see item 12).                                                                                                | 5 |
| Results of individual studies | 20 For all outcomes considered (benefits or harms), present, for each study: (a) simple summary data for each intervention group (b) effect estimates and confidence intervals, ideally with a forest plot. | 5 |
| Synthesis of results          | 21 Present results of each meta-analysis done, including confidence intervals and measures of consistency.                                                                                                  | 5 |
| Risk of bias across studies   | 22 Present results of any assessment of risk of bias across studies (see Item 15).                                                                                                                          | 5 |
| Additional analysis           | 23 Give results of additional analyses, if done (e.g., sensitivity or subgroup analyses, meta-regression [see Item 16]).                                                                                    | 5 |
| DISCUSSION                    |                                                                                                                                                                                                             |   |
| Summary of evidence           | 24 Summarize the main findings including the strength of evidence for each main outcome; consider their relevance to key groups (e.g., healthcare providers, users, and policy makers).                     | 6 |
| Limitations                   | 25 Discuss limitations at study and outcome level (e.g., risk of bias), and at review-level (e.g., incomplete retrieval of identified research, reporting bias).                                            | 6 |
| Conclusions                   | 26 Provide a general interpretation of the results in the context of other evidence, and implications for future research.                                                                                  | 7 |
| FUNDING                       |                                                                                                                                                                                                             |   |
| Funding                       | 27 Describe sources of funding for the systematic review and other support (e.g., supply of data); role of funders for the systematic review.                                                               | 1 |

---

**Table S2.** Search strategy in MEDLINE via Pubmed.

---

(covid or COVID-19 OR coronavirus OR "corona virus" OR SARSCoV-2 OR "Coronavirus"[Mesh] OR "severe acute respiratory syndrome coronavirus 2"[Supplementary Concept] OR "COVID-19"[Supplementary Concept] OR "Coronavirus Infections/epidemiology"[Mesh] OR "Coronavirus Infections/prevention and control"[Mesh] OR "Coronavirus Infections/psychology"[Mesh] OR "Coronavirus Infections/statistics and numerical data"[Mesh]) AND (anxiety OR anxiety symptoms OR anxiety disorders OR anxious OR "Trauma and Stressor Related Disorders"[Mesh] OR "Anxiety"[Mesh] OR "Anxiety Disorders"[Mesh] OR "Anxiety/epidemiology"[Mesh] OR "Anxiety/statistics and numerical data"[Mesh] OR depression OR depressive OR "Depression"[Mesh] OR "Depressive Disorder"[Mesh] OR "Depression/statistics and numerical data"[Mesh]) AND ("healthcare workers" OR "medical staff" OR "healthcare professionals" OR "health care workers" OR "health workers" OR "health professionals" OR "health personnel" OR "Health Personnel"[Mesh])

---

**Table S3.** Quality assessment with the JBI Appraisal Checklist for Prevalence Studies.

| Study                          | 1 | 2 | 3 | 4 | 5 | 6 | 7 | 8 | 9 | TOTAL |
|--------------------------------|---|---|---|---|---|---|---|---|---|-------|
| Almater et al. (2020)          | Y | N | N | Y | Y | Y | Y | Y | N | 6     |
| An et al. (2020)               | Y | N | Y | Y | Y | Y | Y | Y | N | 7     |
| Cai et al. (2020)              | Y | N | Y | Y | Y | Y | Y | Y | N | 7     |
| Chen J. et al. (2020)          | Y | N | Y | Y | Y | Y | Y | Y | N | 7     |
| Chen Y. et al. (2020)          | Y | U | N | Y | Y | Y | Y | Y | Y | 7     |
| Chew et al. (2020)             | Y | U | Y | Y | Y | Y | Y | Y | Y | 8     |
| Dal'Bosco et al. (2020)        | Y | N | N | Y | Y | Y | Y | Y | N | 6     |
| Di Tella et al. (2020)         | Y | N | N | Y | Y | Y | Y | Y | N | 6     |
| Dosil Santamaría et al. (2020) | Y | N | Y | Y | Y | Y | Y | Y | N | 7     |
| Elbay et al.(2020)             | Y | N | Y | Y | Y | Y | Y | Y | N | 7     |
| Elhadi et al. (2020)           | Y | N | Y | Y | Y | Y | Y | Y | Y | 8     |
| Gallopeni et al. (2020)        | Y | U | Y | Y | Y | Y | Y | Y | N | 7     |
| Gupta A.K. et al. (2020)       | Y | N | N | Y | Y | Y | Y | Y | N | 6     |
| Gupta S. et al. (2020)         | Y | N | Y | Y | Y | Y | Y | Y | Y | 8     |
| Huang & Zhao (2020)            | Y | N | Y | N | Y | Y | Y | Y | Y | 7     |
| Kannampallil et al. (2020)     | Y | U | Y | N | Y | Y | Y | Y | N | 6     |
| Keubo et al. (2020)            | Y | N | N | Y | Y | Y | Y | Y | N | 6     |
| Khanna et al. (2020)           | Y | U | Y | Y | Y | Y | Y | Y | N | 7     |
| Koksal et al. (2020)           | Y | U | Y | Y | Y | Y | Y | Y | N | 7     |
| Krammer et al. (2020)          | Y | N | N | Y | Y | Y | Y | Y | Y | 7     |
| Lai et al. (2020)              | Y | N | Y | Y | Y | Y | Y | Y | Y | 8     |
| Lam et al. (2020)              | Y | N | Y | N | Y | Y | Y | Y | Y | 7     |
| Li G. et al. (2020)            | Y | N | Y | Y | Y | Y | Y | Y | Y | 8     |
| Liang et al. (2020)            | Y | N | Y | Y | Y | Y | Y | Y | N | 7     |
| Lin et al. (2020)              | Y | N | Y | N | Y | Y | Y | Y | N | 6     |
| Liu Y. et al. (2020)           | Y | N | Y | Y | Y | Y | Y | Y | N | 7     |
| Lu et al. (2020)               | Y | U | Y | Y | Y | Y | Y | Y | Y | 8     |
| Luceño-Moreno et al. (2020)    | Y | N | Y | Y | Y | Y | Y | Y | Y | 8     |
| Magnavita et al. (2020)        | Y | N | Y | Y | Y | Y | Y | Y | Y | 8     |
| Naser et al. (2020)            | Y | N | Y | Y | Y | Y | Y | Y | N | 7     |
| Ning et al. (2020)             | Y | N | Y | Y | Y | Y | Y | Y | N | 7     |
| Pouralizadeh et al. (2020)     | Y | U | Y | Y | Y | Y | Y | Y | N | 7     |
| Que et al. (2020)              | Y | N | Y | Y | Y | Y | Y | Y | N | 7     |
| Sahin et al. (2020)            | Y | N | Y | Y | Y | Y | Y | Y | N | 7     |
| Salopek-Žiha et al. (2020)     | Y | N | N | N | Y | Y | Y | Y | N | 5     |
| Sandesh et al. (2020)          | Y | N | N | N | Y | Y | Y | Y | N | 5     |
| Si et al. (2020)               | Y | N | Y | Y | Y | Y | Y | Y | Y | 8     |
| Song et al. (2020)             | Y | N | Y | Y | Y | Y | Y | Y | N | 7     |
| Stojanov et al. (2020)         | Y | U | N | Y | Y | Y | Y | Y | N | 6     |
| Suryavanshi et al. (2020)      | Y | N | N | Y | Y | Y | Y | Y | N | 6     |
| Teng et al. (2020)             | Y | N | Y | N | Y | Y | Y | Y | N | 6     |
| Teo et al. (2020)              | Y | U | N | Y | Y | Y | Y | Y | Y | 7     |
| Tu et al. (2020)               | Y | Y | N | Y | Y | Y | Y | Y | Y | 8     |

|                         |   |   |   |   |   |   |   |   |   |   |
|-------------------------|---|---|---|---|---|---|---|---|---|---|
| Vanni et al. (2020)     | Y | N | N | Y | Y | Y | Y | Y | Y | 7 |
| Wang H. et al. (2020)   | Y | N | Y | N | Y | Y | Y | Y | Y | 7 |
| Wang L.Q. et al. (2020) | Y | N | N | Y | Y | Y | Y | Y | N | 6 |
| Wang S. et al. (2020)   | Y | N | N | Y | Y | Y | Y | Y | Y | 7 |
| Wang W. et al. (2020)   | Y | N | Y | Y | Y | Y | Y | Y | Y | 8 |
| Wankowicz et al. (2020) | Y | U | Y | Y | Y | Y | Y | Y | N | 7 |
| Xiao et al. (2020)      | Y | N | Y | N | Y | Y | Y | Y | N | 6 |
| Xiaoming et al. (2020)  | Y | N | Y | Y | Y | Y | Y | Y | Y | 8 |
| Xiong et al. (2020)     | Y | N | N | Y | Y | Y | Y | Y | Y | 7 |
| Yang S. et al. (2020)   | Y | N | N | Y | Y | Y | Y | Y | Y | 7 |
| Zhang C. et al. (2020)  | Y | N | Y | Y | Y | Y | Y | Y | Y | 8 |
| Zhou et al. (2020)      | Y | U | Y | Y | Y | Y | Y | Y | N | 7 |
| Zhu J. et al. (2020)    | Y | N | N | Y | Y | Y | Y | Y | N | 6 |
| Zhu Z. et al. (2020)    | Y | N | Y | Y | Y | Y | Y | Y | Y | 8 |

**Abbreviations:** N: No; U: Unclear; Y: Yes; 1: Was the sample frame appropriate to address the target population?; 2: Were study participants recruited in an appropriate way?; 3: Was the sample size adequate?; 4: Were the study subjects and setting described in detail?; 5: Was data analysis conducted with sufficient coverage of the identified sample?; 6: Were valid methods used for the identification of the condition?; 7: Was the condition measured in a standard, reliable way for all participants?; 8: Was there appropriate statistical analysis?; 9: Was the response rate adequate, and if not, was the low response rate managed appropriately?
